# Supplementary material for: Hydraulic conductance as well as nitrogen accumulation plays a role in the higher rate of leaf photosynthesis of the most productive variety of rice in Japan
Source: PubMed Central journal article supplement — J Exp Bot. 2011 Apr 28;62(11):4067–77. doi: 10.1093/jxb/err126 (PMC3134360; doi:10.1093/jxb/err126), 2011-04-28
Supplement: supp_err126_00058289-file001.pdf [file supp_err126_00058289-file001.pdf]

**Hydraulic conductance as well as nitrogen accumulation plays a role in the higher rate of leaf photosynthesis of the most productive variety of rice in Japan.** R Decenella Taylaran, S Adachi, T Ookawa, H Usuda, and T Hirasawa

SUPPLEMENTARY TABLE

**Table S1.** Effects of nitrogen top-dressing on dry weight (DW) and accumulated nitrogen (AN) at various growth stages in rice plants grown in 12-L pots.

Standard deviations are given in parentheses (n=5). Asterisks \*\* and \*\*\*: Values are significantly different at the 1% and 0.1% level, respectively, by Student's t-test; ns: not significant. Top-dressing with nitrogen was applied at tillering (3 weeks after transplanting; 0.25 g N hill<sup>-1</sup>; tillering-stage treatment), at booting (when the flag leaf had just expanded fully; 0.25 g N hill<sup>-1</sup>; heading-stage treatment), and at ripening (2.5 weeks after heading; 0.20 g N hill<sup>-1</sup>; ripening-stage treatment). Samples were collected approximately 10 days after top-dressing. The amount of nitrogen applied as basal dressing at transplanting was decreased to 0.1 g pot<sup>-1</sup> for the rice plants that were treated at the tillering stage. For the plants treated at heading, 0.5 g pot<sup>-1</sup> of nitrogen was applied as basal dressing at transplanting. For the plants treated at the ripening stage, nitrogen was applied as basal dressing at 0.5 g pot<sup>-1</sup> at transplanting and at 0.5 g pot<sup>-1</sup> at the booting stage.

| Time of treatment | Variety     | Without top-dressing              |                                   | With top-dressing                 |                                   | Difference (D - B) |
|-------------------|-------------|-----------------------------------|-----------------------------------|-----------------------------------|-----------------------------------|--------------------|
|                   |             | DW (A)<br>(g hill <sup>-1</sup> ) | AN (B)<br>(g hill <sup>-1</sup> ) | DW (C)<br>(g hill <sup>-1</sup> ) | AN (D)<br>(g hill <sup>-1</sup> ) |                    |
| Tillering stage   | Takanari    | 6.97 (0.51)                       | 0.22 (0.01)                       | 7.83 (0.49)                       | 0.27 (0.02)                       | 0.05               |
|                   | Koshihikari | 6.66 (0.50)                       | 0.19 (0.01)                       | 7.11 (0.46)                       | 0.25 (0.02)                       | 0.06               |
|                   |             | ns                                | ns                                | ns                                | ns                                |                    |
| Heading stage     | Takanari    | 68.3 (0.96)                       | 0.48 (0.01)                       | 76.3 (0.71)                       | 0.77 (0.01)                       | 0.29               |
|                   | Koshihikari | 59.7 (1.37)                       | 0.38 (0.01)                       | 64.8 (1.43)                       | 0.58 (0.02)                       | 0.20               |
|                   |             | ***                               | **                                | ***                               | ***                               |                    |
| Ripening stage    | Takanari    | 103.3 (1.94)                      | 0.83 (0.01)                       | 110.0 (1.08)                      | 1.04 (0.01)                       | 0.21               |
|                   | Koshihikari | 87.3 (1.22)                       | 0.68 (0.01)                       | 92.2 (1.34)                       | 0.80 (0.01)                       | 0.12               |
|                   |             | ***                               | **                                | ***                               | ***                               |                    |
